# Supplementary material for: Ternary-doped carbon electrodes for advanced aqueous solid-state supercapacitors based on a “water-in-salt” gel electrolyte
Source: Royal Society of Chemistry journal article supplement (doi:10.1039/c9ta02690h), 2019-01-01
Supplement: c9ta02690h1.pdf [file c9ta02690h1.pdf]

## Electronic Supplementary Information

### Ternary-doped carbon electrodes for advanced aqueous solid-state supercapacitors based on a "water-in-salt" gel electrolyte

Ziyang Song,<sup>a</sup> Hui Duan,<sup>a</sup> Dazhang Zhu,<sup>a</sup> Yaokang Lv,<sup>b</sup> Wei Xiong,<sup>c</sup> Tongcheng Cao,<sup>ad</sup> Liangchun Li,<sup>a</sup> Mingxian Liu,<sup>\*ae</sup> and Lihua Gan<sup>\*a</sup>

<sup>a</sup>Shanghai Key Lab of Chemical Assessment and Sustainability, School of Chemical Science and Engineering, Tongji University, Shanghai, 200092, P. R. China.

<sup>b</sup>College of Chemical Engineering, Zhejiang University of Technology, Hangzhou 310014, P. R. China.

<sup>c</sup>Key Laboratory for Green Chemical Process of Ministry of Education, School of Chemistry and Environmental Engineering, Wuhan Institute of Technology, Wuhan 430073, P. R. China.

<sup>d</sup>Key Laboratory of Road and Traffic Engineering of Ministry of Education, Tongji University, Shanghai 201804, P. R. China.

<sup>e</sup>College of Chemistry and Molecular Engineering, Zhengzhou University, Zhengzhou 450001, P. R. China

**\*Corresponding Authors**

E-mail: [liumx@tongji.edu.cn](mailto:liumx@tongji.edu.cn), [ganlh@tongji.edu.cn](mailto:ganlh@tongji.edu.cn)

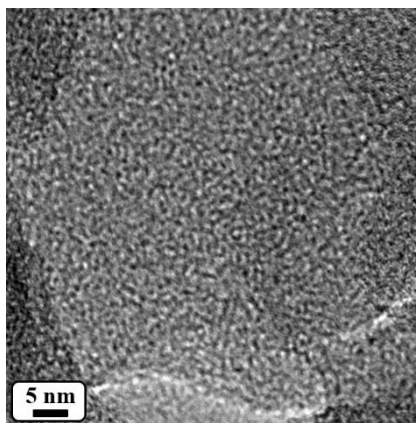

**Fig. S1.** A high-resolution TEM image of NSOC-2.

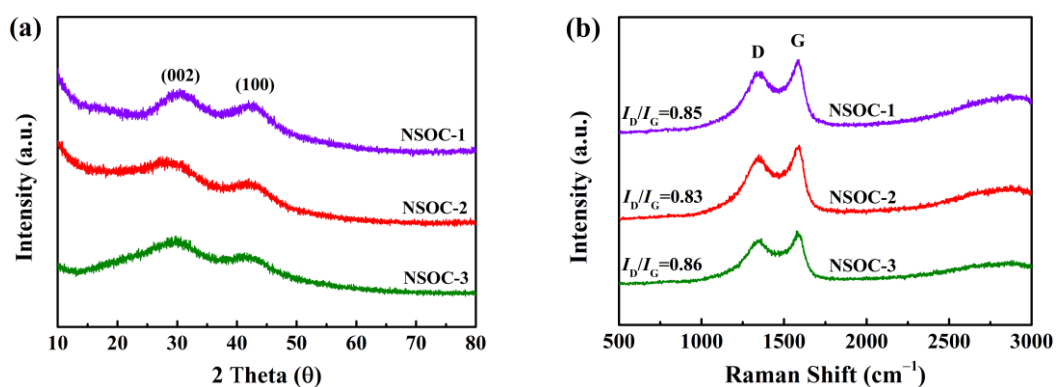

**Fig. S2.** (a) XRD patterns and (b) Raman spectra of NSOC<sub>s</sub>.

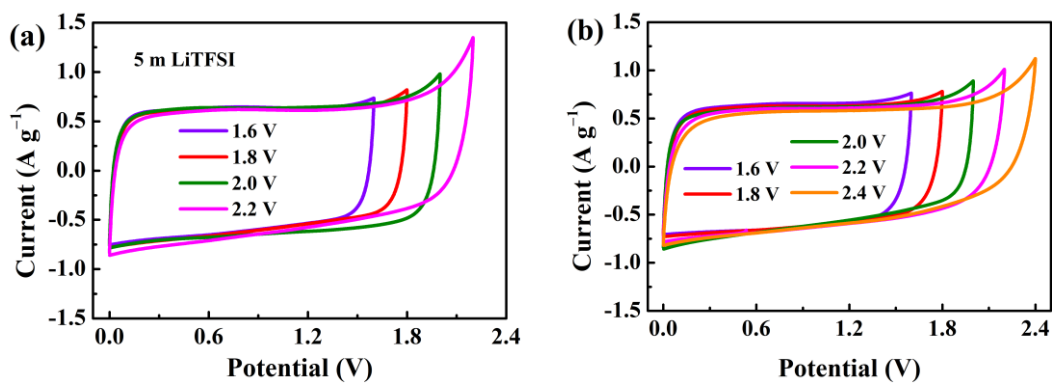

**Fig. S3.** CV curves of NSOC-2 based supercapacitors using (a) 5 and (b) 10 m LiTFSI electrolyte, respectively.

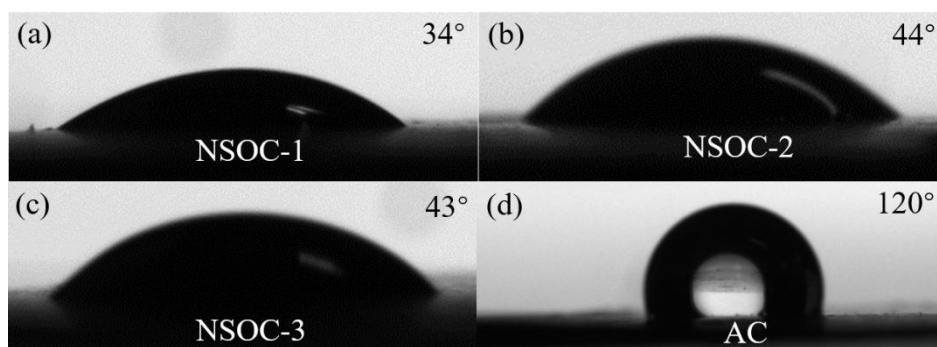

**Fig. S4.** The contact angles of WIS electrolyte on the surface of NSOCs and commercial activated carbon (AC).

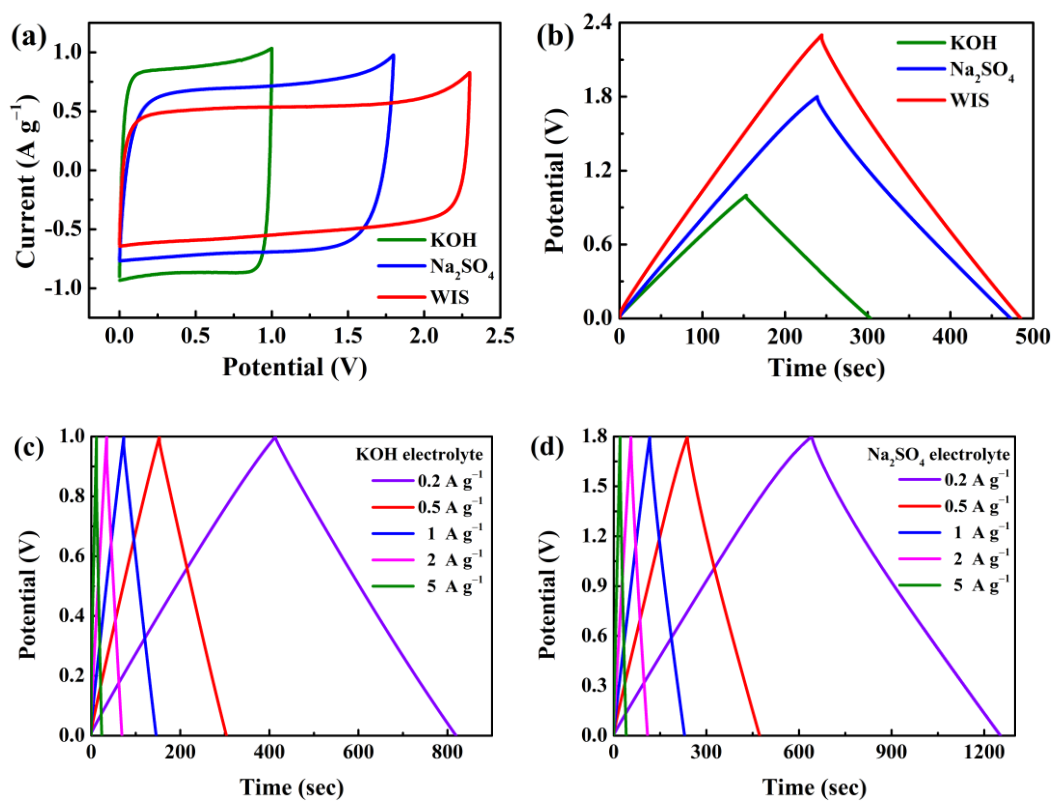

**Fig. S5.** Electrochemical performances of symmetrical supercapacitors using aqueous electrolytes: (a) CV curves and (b) GCD profiles of NSOC-2 based device in KOH,  $\text{Na}_2\text{SO}_4$ , and WIS electrolyte, respectively. GCD curves of NSOC-2 loaded supercapacitor in (c) KOH and (d)  $\text{Na}_2\text{SO}_4$  electrolyte.

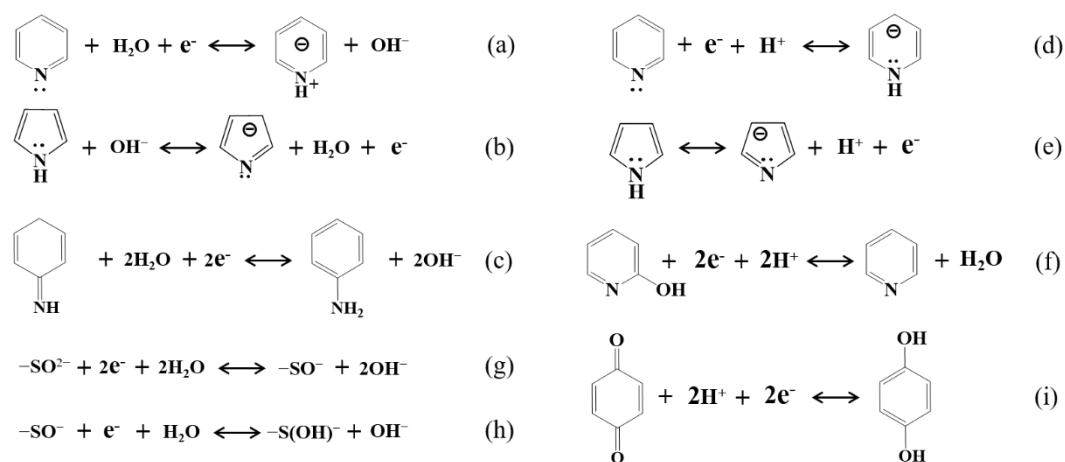

**Fig. S6.** Redox reactions and effects of N, S, O-related functional groups.

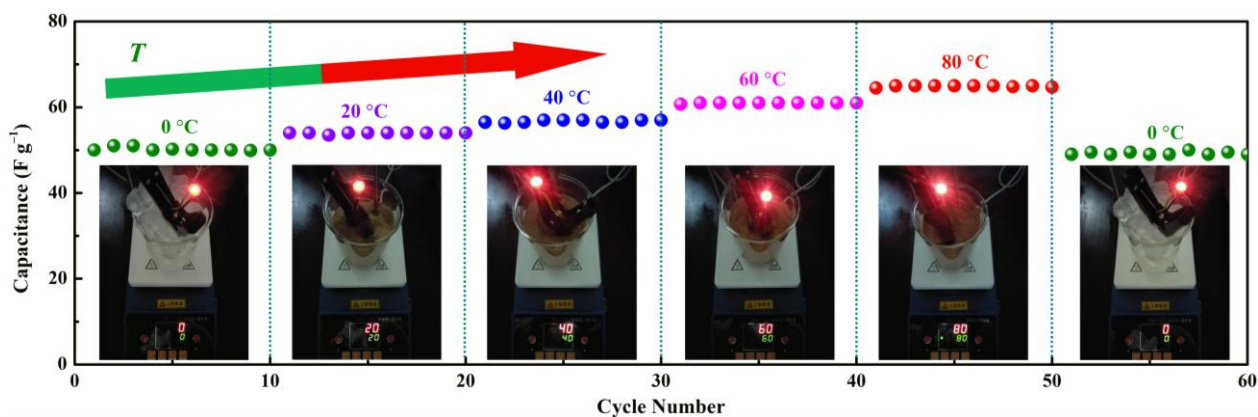

**Fig. S7.** Capacitance enhancement as a function of the temperature from 0 to 80 °C (the insets depict the images of lighted red LED lamps powered by a supercapacitor).

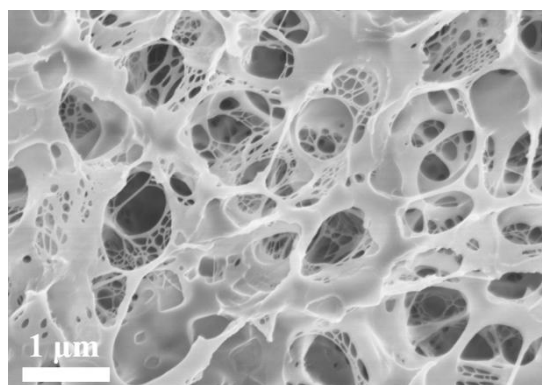

**Fig. S8.** A typical SEM image of the gel support.

**Table S1.** Comparison of the energy densities ( $E$ ) between our assembled aqueous solid-state supercapacitor and the relative references.

| Electrode Materials                     | Electrolyte Voltages                        | $E$<br>(Wh kg <sup>-1</sup> ) | $P$<br>(W kg <sup>-1</sup> ) | Ref. |
|-----------------------------------------|---------------------------------------------|-------------------------------|------------------------------|------|
| Commercial activate carbon              | PVDF-HFP/[emim][NTf <sub>2</sub> ] (2.5 V)  | 21.9                          | 6250                         | 26   |
| MnO <sub>2</sub> nanosheet/carbon fiber | PVA/LiCl (1.5 V)                            | 27.2                          | 979.7                        | 69   |
| Carbon nanotube/graphene aerogel        | PVA/Na <sub>2</sub> SO <sub>4</sub> (1.8 V) | 18.42                         | 2320                         | 68   |
| Carbon nanosheet/graphene               | PVA/KOH (1 V)                               | 6.3                           | 2400                         | 42   |
| Carbon foams                            | PVA/LiCl (2 V)                              | 1.35                          | 2900                         | 59   |
| Carbon nanofibers                       | PVA/KOH (1 V)                               | 10.96                         | 250                          | 47   |
| Graphene quantum dots                   | H <sub>2</sub> SO <sub>4</sub> /PVA (1 V)   | 18.75                         | 108.7                        | 70   |
| Graphene oxide sheets                   | H <sub>3</sub> PO <sub>4</sub> /PVA (1 V)   | 4.4                           | 24                           | 67   |
| Ternary-doped carbons                   | WIS/gel (2.3 V)                             | 37.7                          | 230                          | This |
|                                         |                                             | 31.1                          | 979.7                        | Work |
|                                         |                                             | 24.7                          | 6250                         |      |
